# Supplementary material for: A Machine Learning Approach Reveals a Microbiota Signature for Infection with Mycobacterium avium subsp. paratuberculosis in Cattle
Source: PubMed Central journal article supplement (PMC9927500; doi:10.1128/spectrum.03134-22), 2023-01-19
Supplement: spectrum.03134-22-s0001.pdf [file spectrum.03134-22-s0001.pdf]

1 **Supplementary figures and tables**

2

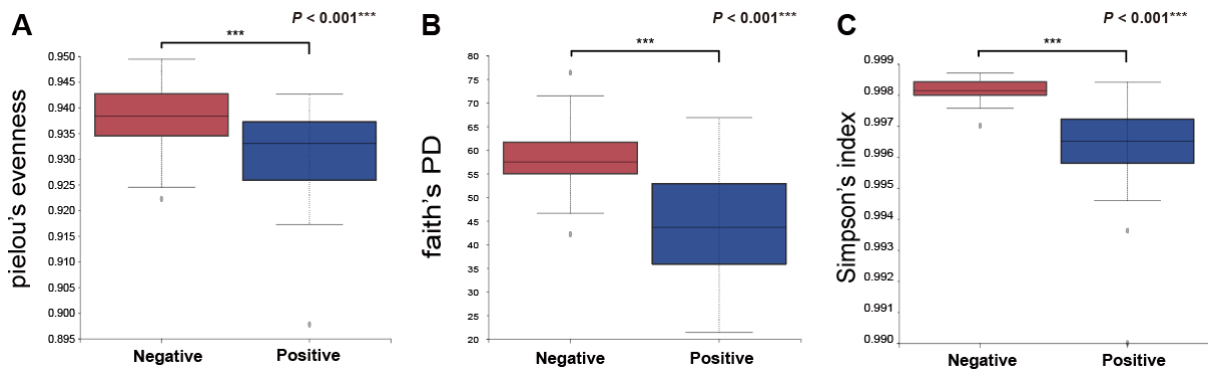

3

4 **Supplementary Figure S1. Alpha diversity indices for the MAP-negative/-positive group.**

5 (A) Evenness index (Pielou's evenness) (B-C) Diversity indices (B: Faith's PD, C: Simpson's  
6 index).

7

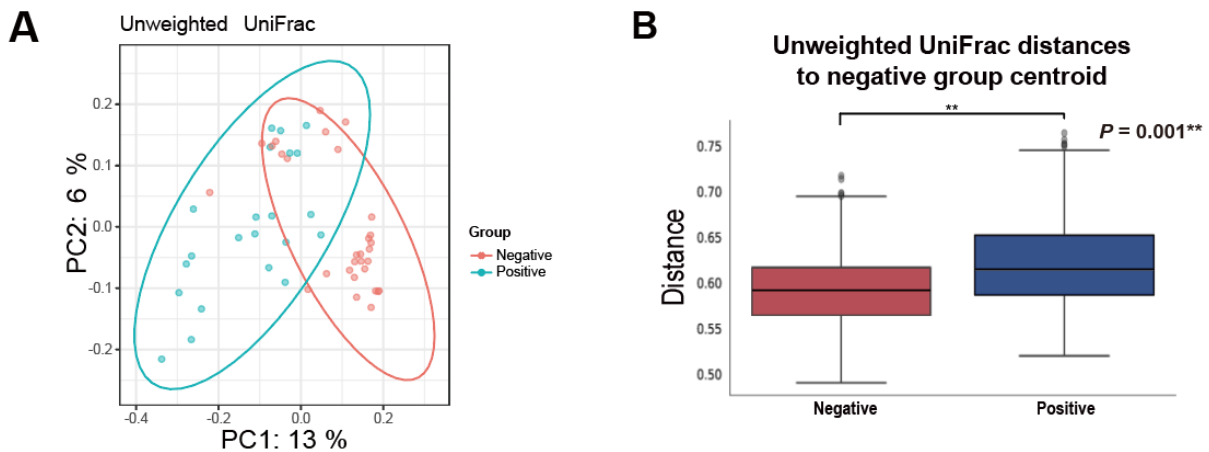

8

9 **Supplementary Figure S2. Beta diversity based on unweighted UniFrac distances. (A)**

10 PCoA plot for unweighted UniFrac distance (B) Box-and-whisker plot for distances from the  
11 centroid of the MAP-negative group.

12

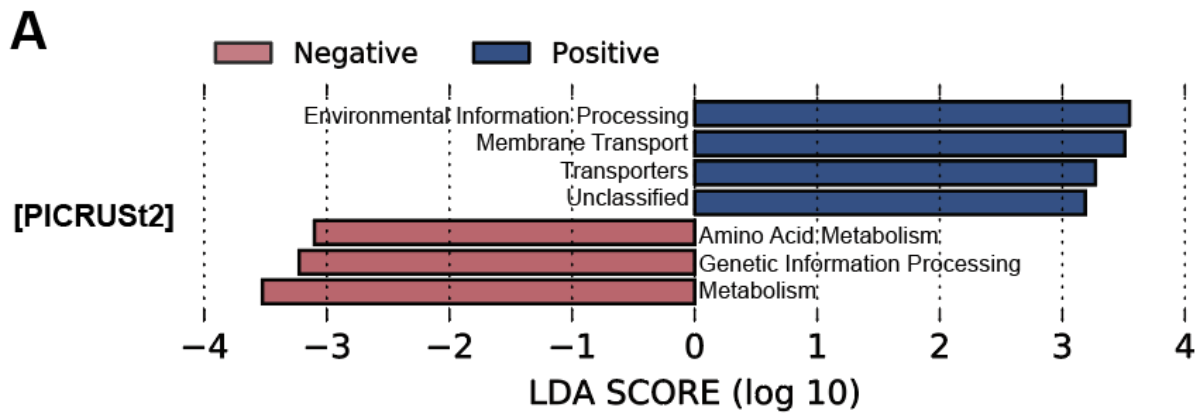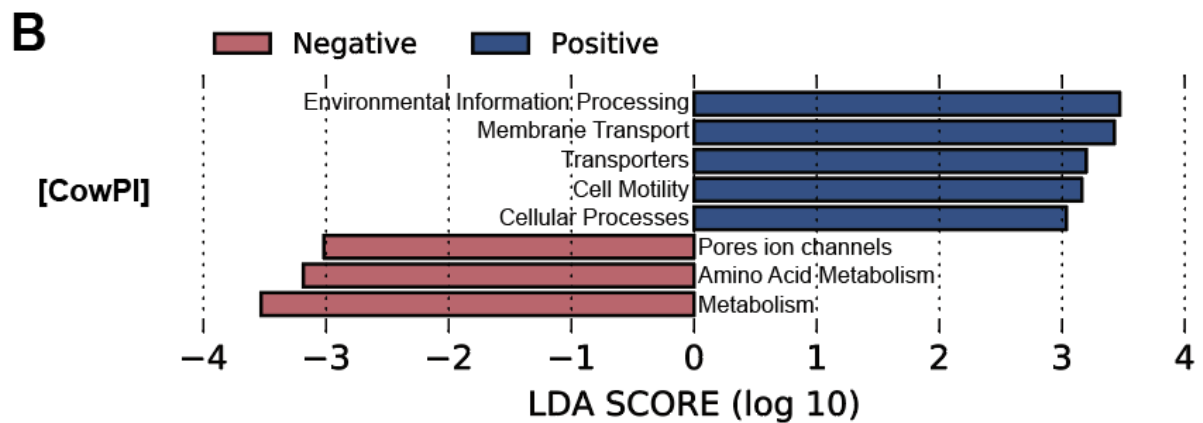

13

14 **Supplementary Figure S3. Differentially abundant KEGG pathway-mapped metabolic**

15 **function by MAP infection. (A) The presumptive functions were predicted by PICRUSt2 and**

16 **(B) CowPI - a rumen microbiome focussed version of PICRUSt. Positive group-enriched**

17 **pathways are indicated with a positive LDA score (blue), and negative group-enriched**

18 **pathways with a negative score (red). Only pathways meeting an LDA significance threshold**

19 **of >3 are shown.**

### A Raw

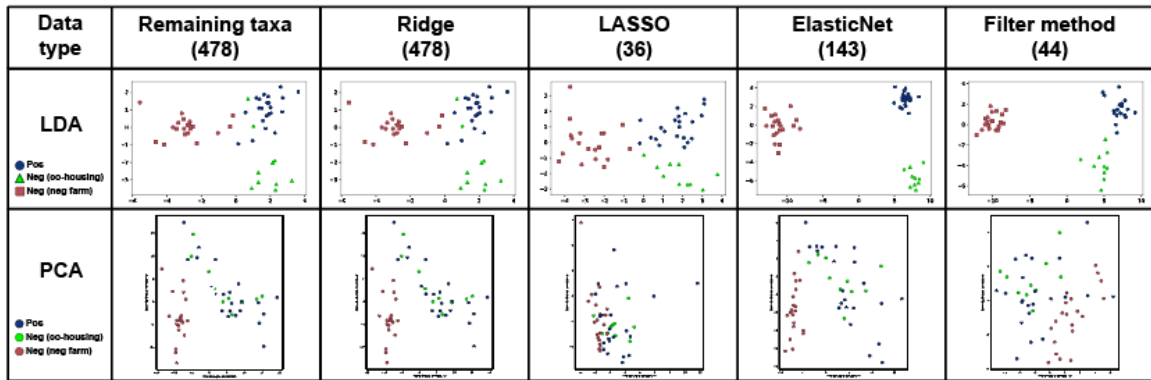

### B 1.5 power

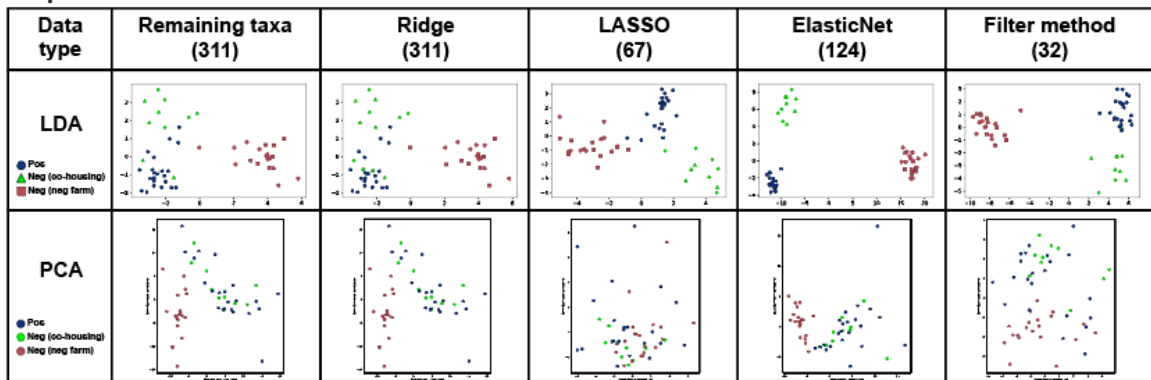

### C exp

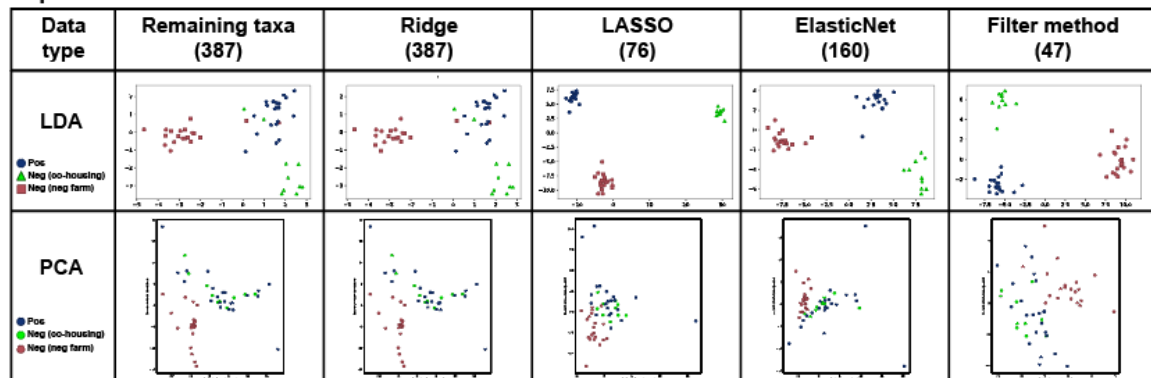

20

21 **Supplementary Figure S4. Selection of microbial features using four feature selection**

22 **algorithms/tools with three different types of transformed values. (A) LDA and PCA**

23 plots after selecting microbial features from the quasi/constant value-removed remaining taxa

24 dataset, (B) its 1.5 power-transformed dataset, and (C) exponential-transformed dataset. All

25 numeric values in parentheses indicate the number of features selected by each

26 algorithm/tool. The Ridge method was excluded for visualization since there was little

27 reduction after selecting the features.

28

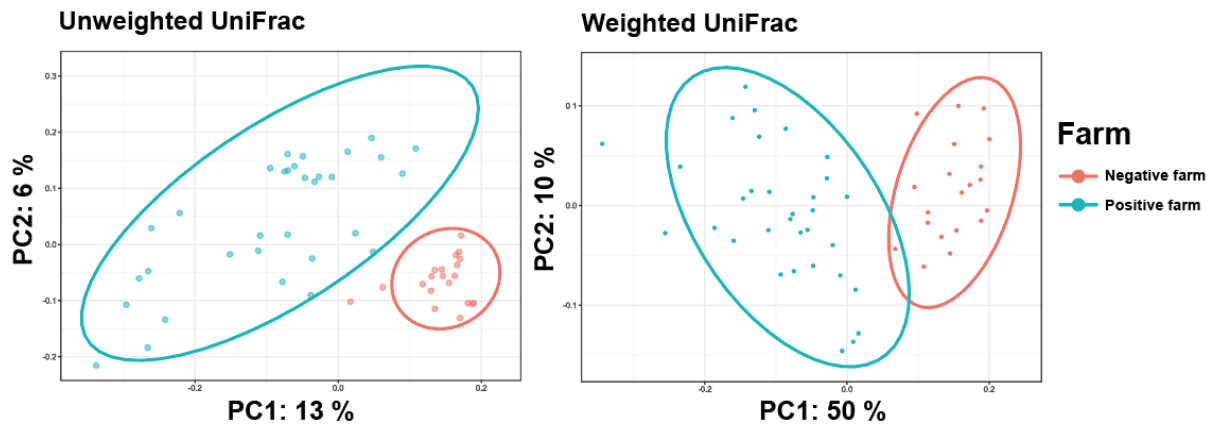

29

30 **Supplementary Figure S5. PCoA plot for beta diversity based on un-/weighted UniFrac**

31 **distances according to farm. Red circles and cyan circles indicate animals in the negative**

32 **farm and the positive farm, respectively.**

33

34 **Supplementary Table S1. General information including diagnostic results and taxa**  
 35 **composition of all 52 samples**

36

37 [attached excel file]

38

39 **Supplementary Table S2. The Calinski–Harabasz index and the Silhouette score for LDA**  
 40 **clustering of the selected features using five feature selection methods**

| Data type        | Calinski-Harabasz index |           |          | Silhouette score |           |       |
|------------------|-------------------------|-----------|----------|------------------|-----------|-------|
|                  | Raw                     | 1.5 power | exp      | Raw              | 1.5 power | exp   |
| Original data    | 128.824                 |           |          | 0.611            |           |       |
| Remaining taxa   | 129.558                 | 211.142   | 196.303  | 0.640            | 0.653     | 0.706 |
| Ridge            | 129.558                 | 211.142   | 196.303  | 0.640            | 0.653     | 0.706 |
| LASSO            | 76.815                  | 128.144   | 3467.708 | 0.512            | 0.630     | 0.908 |
| ElasticNet       | 1122.101                | 2553.817  | 581.362  | 0.852            | 0.867     | 0.824 |
| Feature Selector | 91.371                  | 78.317    | 124.327  | 0.457            | 0.503     | 0.528 |
| Filter method    | 877.581                 | 609.471   | 798.224  | 0.770            | 0.725     | 0.834 |

41

42

43 **Supplementary Table S3. Accuracy and AUC values of random forest models based on**  
 44 **a combination of selected microbial features (M) and conventional diagnostic tools.**

45

| Type | M       |         | M + PCR |         | M + ELISA |         | M + both |         | P value |
|------|---------|---------|---------|---------|-----------|---------|----------|---------|---------|
|      | Acc     | AUC     | Acc     | AUC     | Acc       | AUC     | Acc      | AUC     |         |
| Raw  | 0.89±0. | 0.93±0. | 0.85±0. | 0.92±0. | 0.83±0.   | 0.93±0. | 0.84±0.  | 0.92±0. | 0.98    |

|                           |               |               |               |               |               |               |               |               |      |
|---------------------------|---------------|---------------|---------------|---------------|---------------|---------------|---------------|---------------|------|
|                           | 08            | 05            | 12            | 08            | 08            | 05            | 07            | 08            |      |
| <b>1.5<br/>pow<br/>er</b> | 0.84±0.<br>07 | 0.96±0.<br>04 | 0.89±0.<br>06 | 0.96±0.<br>05 | 0.85±0.<br>06 | 0.96±0.<br>04 | 0.87±0.<br>10 | 0.94±0.<br>07 | 0.63 |
| <b>exp</b>                | 0.86±0.<br>07 | 0.94±0.<br>05 | 0.86±0.<br>06 | 0.95±0.<br>06 | 0.84±0.<br>09 | 0.96±0.<br>04 | 0.89±0.<br>11 | 0.96±0.<br>07 | 0.27 |

46 All values are the mean±SD of values for model accuracy (Acc) and AUC of random forest  
47 models with 10-fold cross-validation (training set: n=49, testing set: n=5) based on the labeled  
48 information of each sample. The models were constructed using selected microbial features  
49 (M) or their combination with the results of other conventional diagnostic tools (e.g. PCR,  
50 ELISA, or both) for every data type (Raw, 1.5 power, and exp). The column “*P* value” indicates  
51 the *p* values of Kruskal–Wallis test for each row.

52

53
